# Supplementary material for: Separation of amyloid β fragment peptides with racemised and isomerised aspartic acid residues using an original chiral resolution labeling reagent
Source: Royal Society of Chemistry journal article supplement (doi:10.1039/d2an01885c), 2023-01-01

## Supplementary information

# **Separation of amyloid $\beta$ fragment peptides with racemised and isomerised aspartic acid residues using an original chiral resolution labeling reagent**

Makoto Ozaki<sup>a</sup>, Motoshi Shimotsuma<sup>a</sup>, Takefumi Kuranaga<sup>b</sup>, Hideaki Kakeya<sup>\*b</sup>,  
and Tsunehisa Hirose<sup>\*a</sup>

<sup>a</sup> Purification Section, Research and Development Department, Nacalai Tesque, Inc., Ishibashi  
Kaide-cho, Muko-shi, Kyoto 617-0004, Japan

<sup>b</sup> Department of System Chemotherapy and Molecular Sciences, Division of Medicinal Frontier  
Sciences, Graduate School of Pharmaceutical Sciences, Kyoto University, Yoshida, Sakyo-ku,  
Kyoto 606-8501, Japan

\*Corresponding author

E-mail: scseigyo-hisyo@pharm.kyoto-u.ac.jp (H. Kakeya)

E-mail: hirose-t@nacalai.co.jp (T. Hirose)

## **CONTENTS**

### Methods

S1. General remarks

S2. Synthesis of the peptides

S3. Labeling protocol of A $\beta$  fragments using D-FDLDA

S4. HPLC measurements

S5. LC–MS measurements and MS/MS analyses

S6. Thioflavin T fluorescence assay

S7. Supplemental references

## S1. General remarks

All the chemicals and solvents were of reagent or high-performance liquid chromatography (HPLC) grade and were used without further purification.

## S2. Synthesis of the peptides

A $\beta$  fragments were manually synthesized on Wang resin (Watanabe Chemical Industries, Hiroshima, Japan) by fluorenylmethoxycarbonyl (Fmoc) chemistry [1] with Fmoc-AA-OH (10 eq., Watanabe Chemical Industries) according to the *O*-(7-azabenzotriazol-1-yl)-1,1,3,3-tetramethyluronium hexafluorophosphate (HBTU, Nacalai Tesque, Kyoto, Japan) method. The *N,N'*-diisopropylcarbodiimide *N,N*-dimethyl-4-aminopyridine (DIPCI-DMAP) method was employed for the first residue. The side-chain-protecting groups used were as follows: *t*-butyloxy carbonyl (Boc) for lysine (Lys); 2,2,4,6,7-pentamethyldihydrobenzofuran-5-sulfonyl (Pbf) for arginine (Arg); *t*-butyl (tBu) for serine (Ser), tyrosine (Tyr), aspartic acid (Asp), and glutamic acid (Glu); and trityl (Trt) for histidine (His), asparagine (Asn), and glutamine (Gln). Fmoc-Asp-tBu, in which the carboxy group of the backbone was protected by a tBu group, was used for the synthesis of the A $\beta$  fragments containing DL-iso-Asp. The A $\beta$  fragments without Met residue were cleaved from the resins, and the side-chain protection was removed by incubating the peptides for 1 h in ultrapure water/triisopropylsilane (Nacalai Tesque)/thioanisole (Tokyo Chemical Industries, Tokyo, Japan)/trifluoroacetic acid (TFA, Nacalai Tesque) (1/1/1/50, vol./vol./vol./vol.). The A $\beta$  fragments containing Met residue were cleaved from the resins, and the side-chain protection was removed by incubating the peptides for 1 h in ultrapure *m*-cresol (Nacalai Tesque)/ethanedithiole (Nacalai Tesque)/thioanisole/TFA (1/2/2/50, vol./vol./vol./vol.). Thereafter, the peptides were precipitated by the addition of cold diethyl ether (Nacalai Tesque), collected by centrifugation, and dissolved in ultrapure water.

## S3. Labeling protocol of A $\beta$ fragments using D-FDLDA

The A $\beta$  fragments were labeled using a DL-amino acid labeling kit (Nacalai Tesque) [2]. The labeling reagent solution (100  $\mu$ L; D-FDLDA; enantiomer excess (ee), > 99.9%) and start solution (100  $\mu$ L) were added to the sample solution (100  $\mu$ L), and the mixture was incubated for 15 h (overnight) at 50 °C. Next, the side-chain delabeling reagent solution (100  $\mu$ L) containing 6-mercapto-1-hexanol was added to the labeled sample solution, mixed using a vortex mixer for 5 s, and reacted at 50°C for 15 min. Stop solution (100  $\mu$ L) was added, and the resulting solution was analyzed by HPLC and LC–mass spectroscopy (MS).

#### **S4. HPLC measurements**

HPLC was performed using a Shimadzu HPLC system (Shimadzu, Kyoto, Japan) equipped with a LC20-AD intelligent pump. Separations were conducted on a COSMOSIL 3C<sub>18</sub>-AR-II (3.0 mm internal diameter (I.D.)  $\times$  150 mm, Nacalai Tesque) column maintained at 40 °C. Solution A comprising 20% acetonitrile in ultrapure water (containing 0.1% formic acid) and solution B comprising 50% acetonitrile in ultrapure water (containing 0.1% formic acid) were used as the mobile phase for the labeled A $\beta$  fragment analysis in the linear gradient elution mode. The flow rate was 0.4 mL/min with ultraviolet (UV) detection at 340 nm.

#### **S5. LC–MS measurements and MS/MS analyses**

An LTQ XL mass spectrometer (Thermo Scientific, Waltham, MA, USA) was used. The sheath gas nitrogen flow was set at 4.5 L/min, and the block heater in the LC–MS equipment was heated to 400 °C. The mass range of  $m/z$  100–2000 was covered with a scan time of 1.0 s, and data were collected in the positive ion mode using a detector voltage of 1.5 kV. The A $\beta$  fragments containing racemised and isomerised Asp residues were detected at  $m/z$  700.7 (labeled A $\beta$ <sub>1–3</sub> fragments, molecular weight (MW) 699.7,  $z = +1$ , single charged peak);  $m/z$  1074.1 (labeled A $\beta$ <sub>6–11</sub> fragments, MW 1073.6,  $z = +1$ ,

single charged peak); and  $m/z$  675.8 (labeled A $\beta$ <sub>23-28</sub> fragments, MW 1351.5,  $z = +2$ , double charged peak). MS/MS analysis was performed by fragmenting the peptides with a normalised collision energy of 35.0.

## **S6. Thioflavin T (ThT) fluorescence assay**

A 1-mM A $\beta$  fragment solution (20  $\mu$ L) was mixed with 10 $\times$  phosphate-buffered saline (PBS) (10  $\mu$ L) and ultrapure water (70  $\mu$ L). After incubation at 37 °C for 24 h, a 200- $\mu$ M sample solution (10  $\mu$ L) was mixed with 200- $\mu$ M ThT (10  $\mu$ L) and 1 $\times$ PBS (80  $\mu$ L). Fluorescence was measured (excitation at 450 nm and emission at 492 nm) using a fluorescence microplate reader (Infinite 200 Pro M Plex, Tecan Japan Co., Ltd., Kanagawa, Japan) [3].

## **S7. Supplemental references**

- [1] Chan, W.C., White, P.D.: Fmoc Solid phase peptide Synthesis; A Practical Approach, Oxford University Press: New York, 2000.
- [2] Ozaki, M., Kuwayama, T., Hirose, T., Shimotsuma, M., Hashimoto, A., Kuranaga, T., Kakeya, H., *Anal. Bioanal. Chem.*, **414**, 4039-4046 (2022).
- [3] Usui, K., Hulleman, J.D., Paulsson, J.F., Siegel, S.J., Powers, E.T., Kelly, J.W., *Proc. Natl. Acad. Sci. USA*, **106**, 18563-18568 (2009).

## Supplemental figures

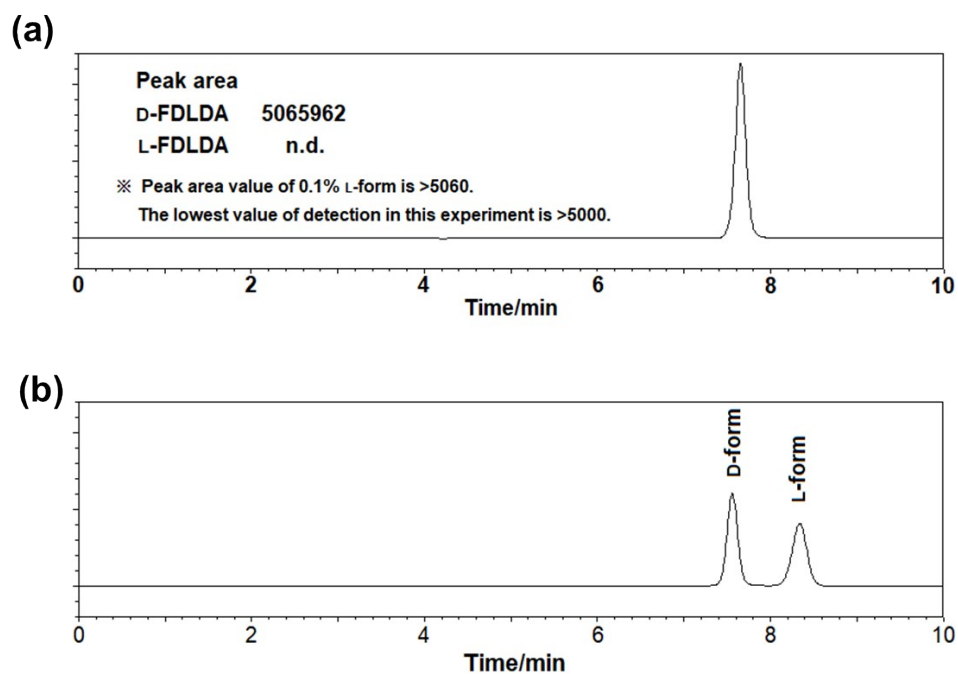

**Fig. S1** HPLC chromatograms of (a) D-FDLDA alone and (b) D-FDLDA and L-FDLDA (1:1) mixtures. The HPLC measurement was performed using a COSMOSIL CHiRAL 3C column (4.6 mm I. D. × 250 mm) for analysis with triethylamine/ethanol/*n*-hexane (0.1/30/70, vol/vol/vol) using isocratic mode at a flow rate of 1.0 mL/min. UV detection was performed at 340 nm.































**A $\beta$ <sub>1-3</sub> fragment (D-form)**

**Labeling reaction**

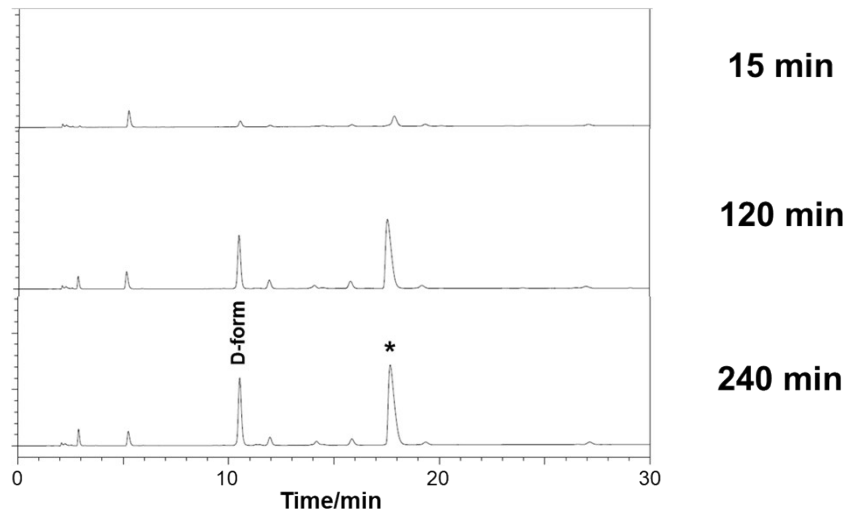

**A $\beta$ <sub>1-3</sub> fragment (L-iso-form)      Labeling reaction**

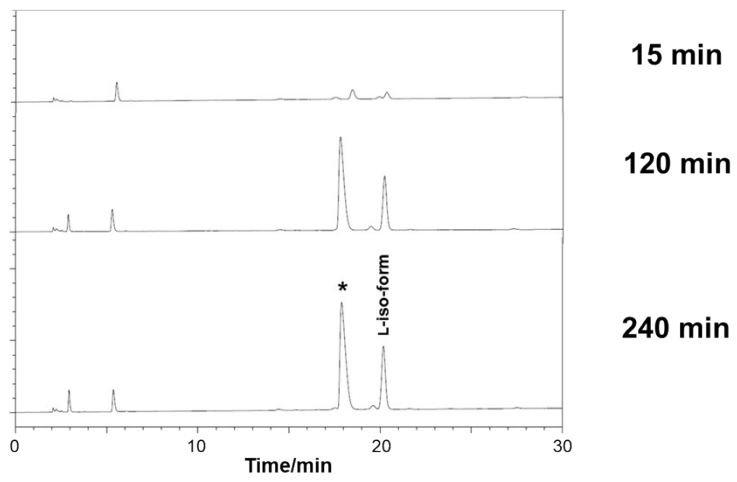

**A $\beta$ <sub>1-3</sub> fragment (D-iso-form)**

**Labeling reaction**

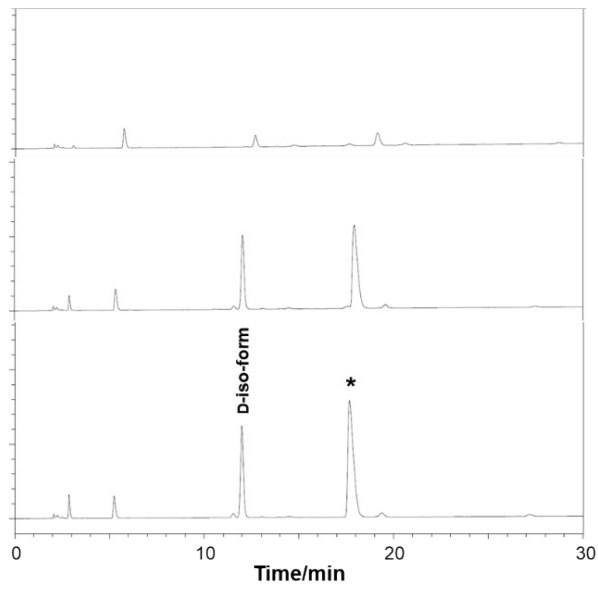

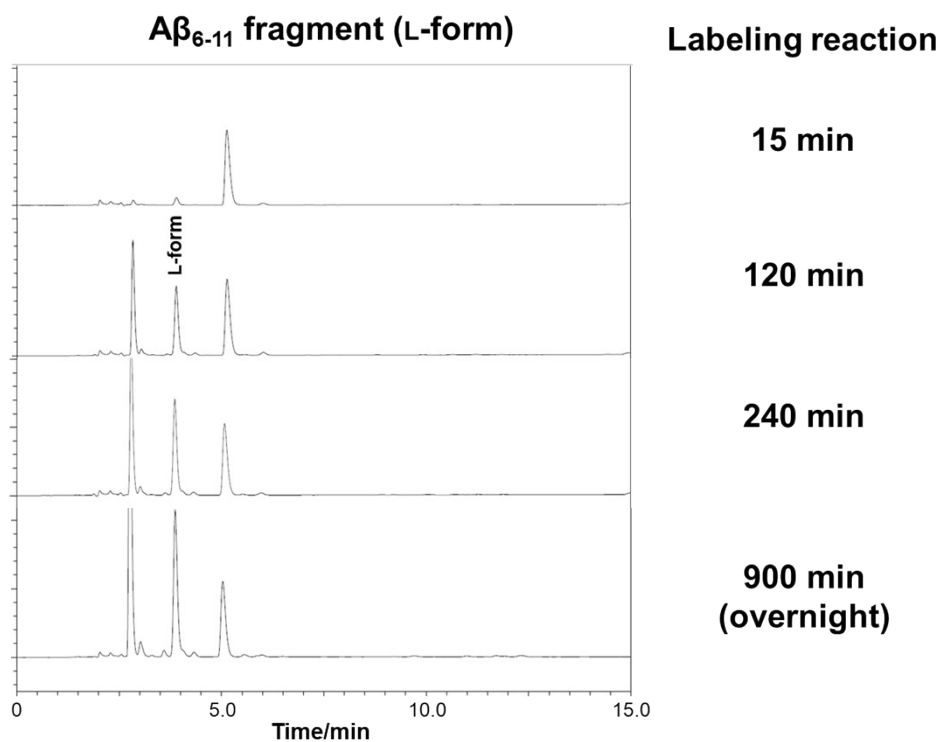

**Fig. S6.** HPLC chromatograms of A $\beta$ <sub>6-11</sub> fragments labeled with D-FDLDA. Analysis was performed using a COSMOSIL 3C<sub>18</sub>-AR-II column (3.0 mm I.D.×150 mm; particle size, 3  $\mu$ m) for analysis with 20% acetonitrile in ultrapure water (containing 0.1% formic acid) and a linear gradient from 0% to 10% with 50% acetonitrile in ultrapure water (containing 0.1% formic acid) over 15 min at a flow rate of 0.4 mL/min at 40 °C. UV detection was performed at 340 nm.

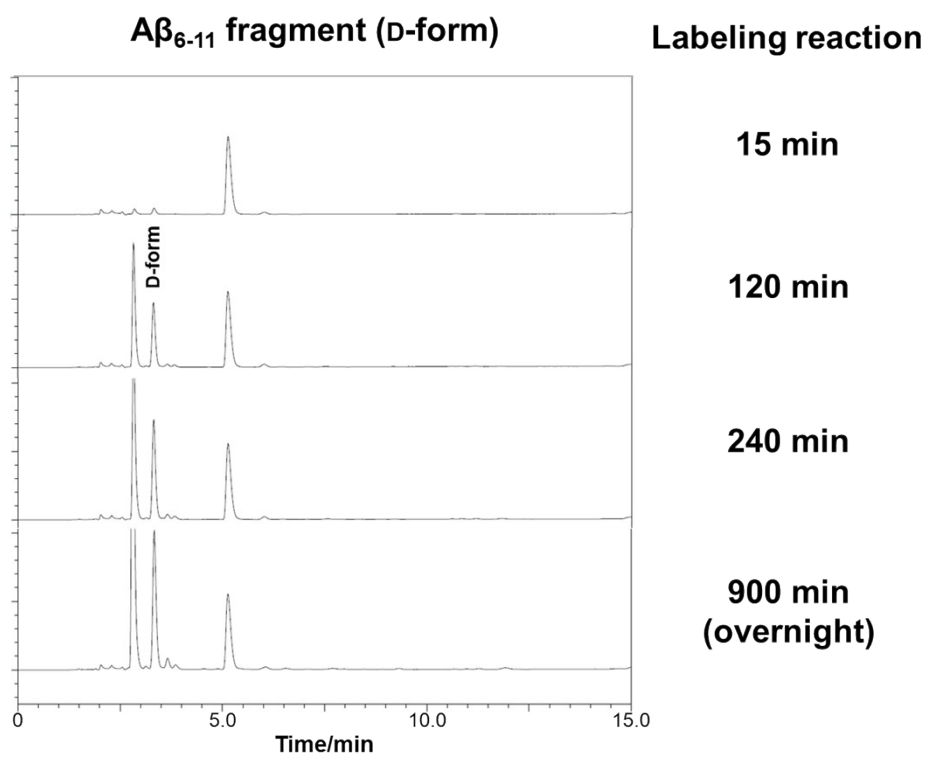



**A $\beta$ <sub>6-11</sub> fragment (L-iso-form)**

**Labeling reaction**

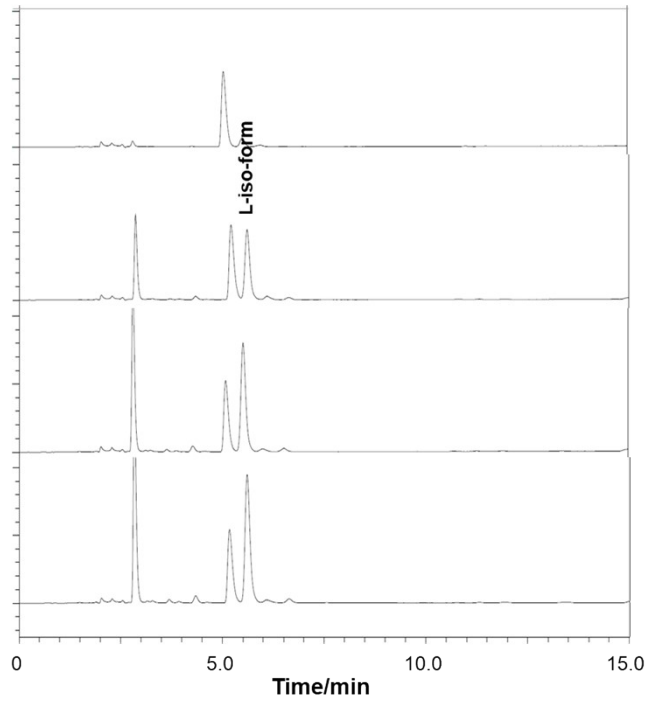

**15 min**

**120 min**

**240 min**

**360 min**

**A $\beta$ <sub>6-11</sub> fragment (D-iso-form)**

**Labeling reaction**

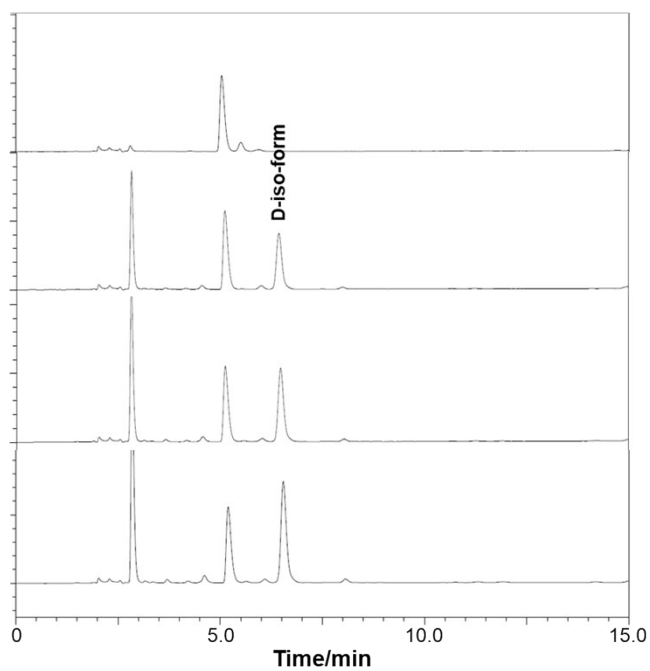

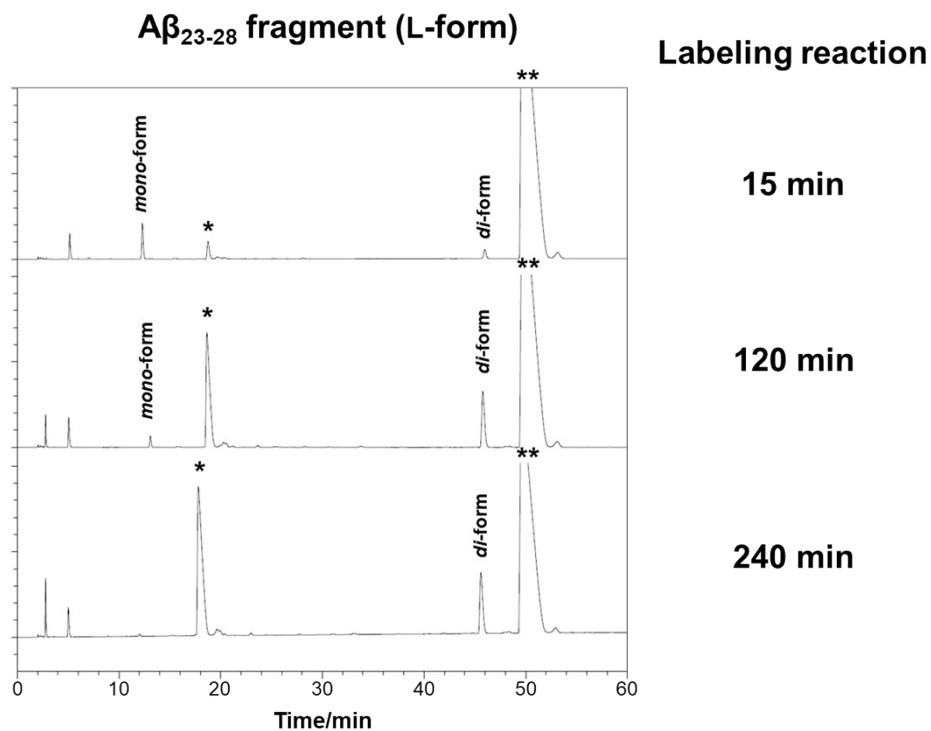

**Fig. S7.** HPLC chromatograms of A $\beta$ <sub>23-28</sub> fragment labeled with D-FDLDA. Analysis was performed using a COSMOSIL 3C<sub>18</sub>-AR-II column (3.0 mm I.D. × 150 mm; particle size, 3  $\mu$ m) for analysis with 20% acetonitrile in ultrapure water (containing 0.1% formic acid) and a linear gradient from 0% to 40% with 50% acetonitrile in ultrapure water (containing 0.1% formic acid) over 60 min at a flow rate of 0.4 mL/min at 40 °C. UV detection was performed at 340 nm. \*Peak derived from hydrolysis. \*\*Peak derived from D-DLDA-S-C<sub>6</sub>H<sub>12</sub>OH.

**A $\beta$ <sub>23-28</sub> fragment (D-form)**

**Labeling reaction**

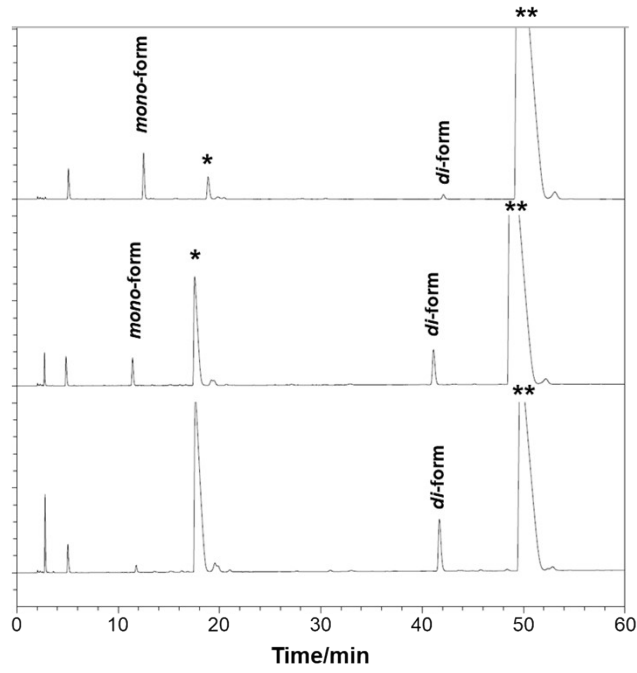

**15 min**

**120 min**

**360 min**

**A $\beta$ <sub>23-28</sub> (L-iso-form)**

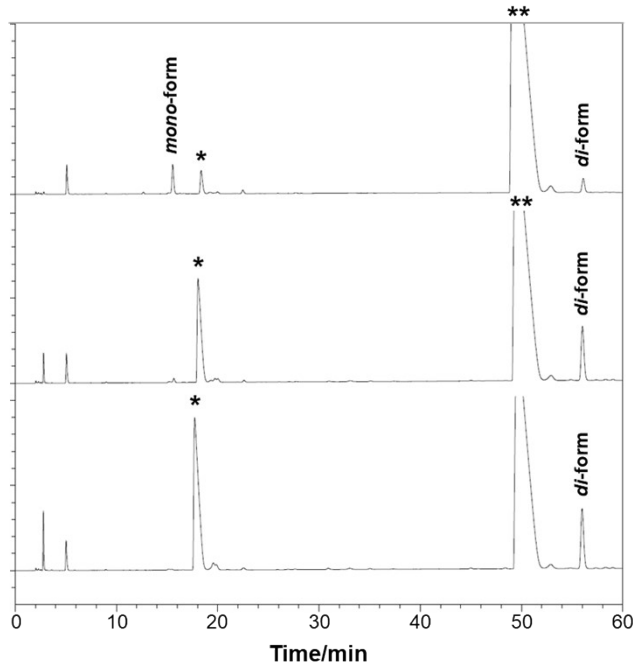

**Labeling reaction**

**15 min**

**120 min**

**240 min**

**A $\beta$ <sub>23-28</sub> fragment (D-iso-form)**

**Labeling reaction**

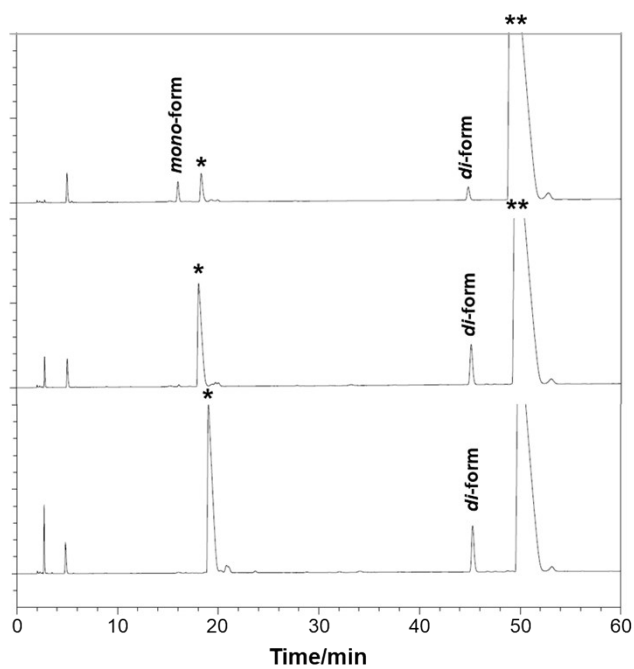

**15 min**

**120 min**

**240 min**

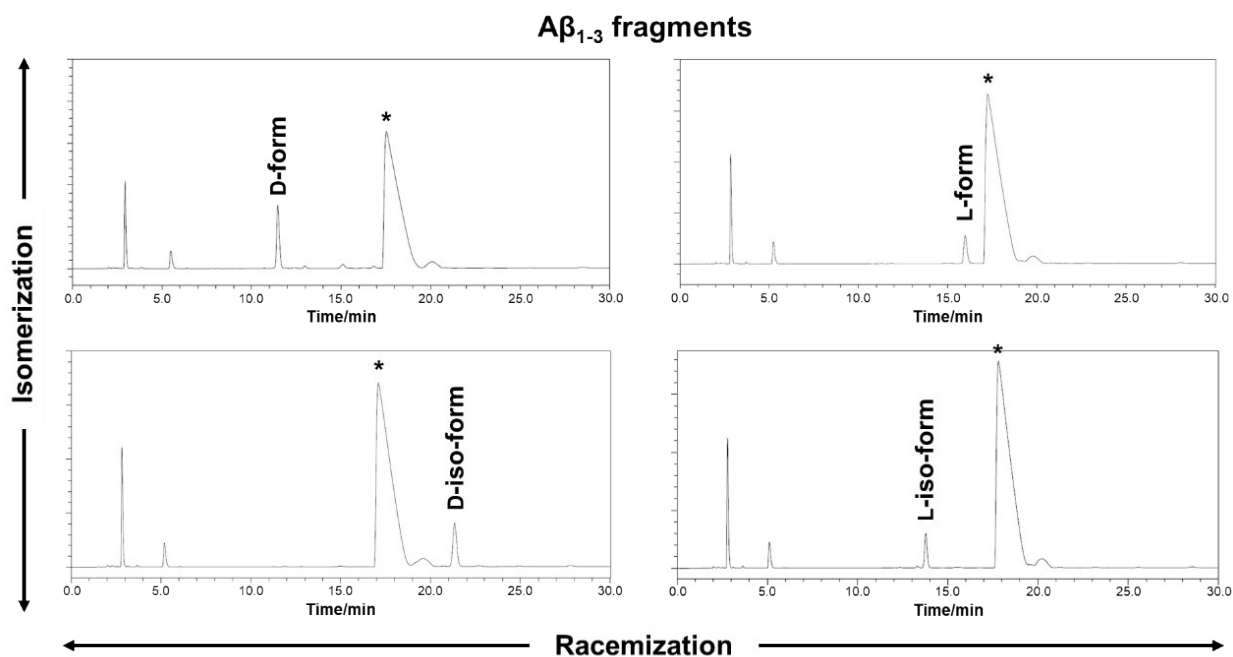

**Fig. S8.** HPLC chromatograms of A $\beta$ <sub>1-3</sub>, A $\beta$ <sub>6-11</sub>, and A $\beta$ <sub>23-28</sub> fragments labeled with D-FDLDA. Analysis was performed using a COSMOSIL 3C<sub>18</sub>-AR-II column (3.0 mm I.D.  $\times$  150 mm; particle size, 3  $\mu$ m) for analysis with 20% acetonitrile in ultrapure water (containing 0.1% formic acid) and a linear gradient from 0% to 40% with 50% acetonitrile in ultrapure water (containing 0.1% formic acid) over 60 min at a flow rate of 0.4 mL/min at 40 °C. UV detection was performed at 340 nm. \*Peak derived from hydrolysis. \*\*Peak derived from D-DLDA-S-C<sub>6</sub>H<sub>12</sub>OH.

### A $\beta$ <sub>6-11</sub> fragments

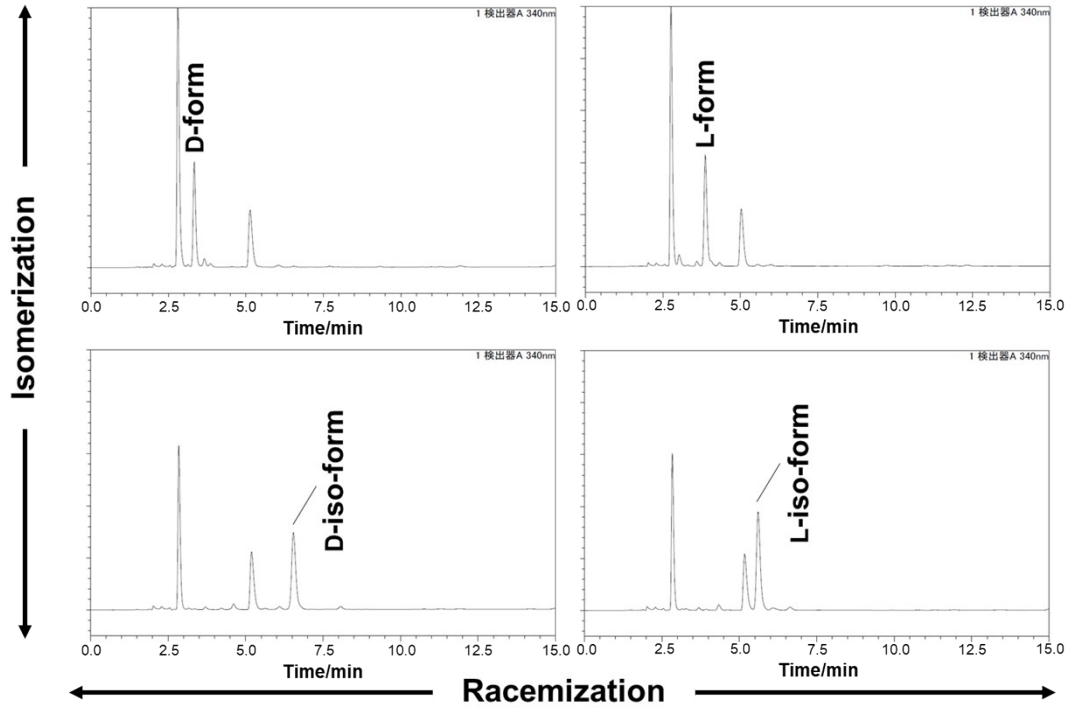



**A $\beta$ <sub>23-28</sub> fragments**

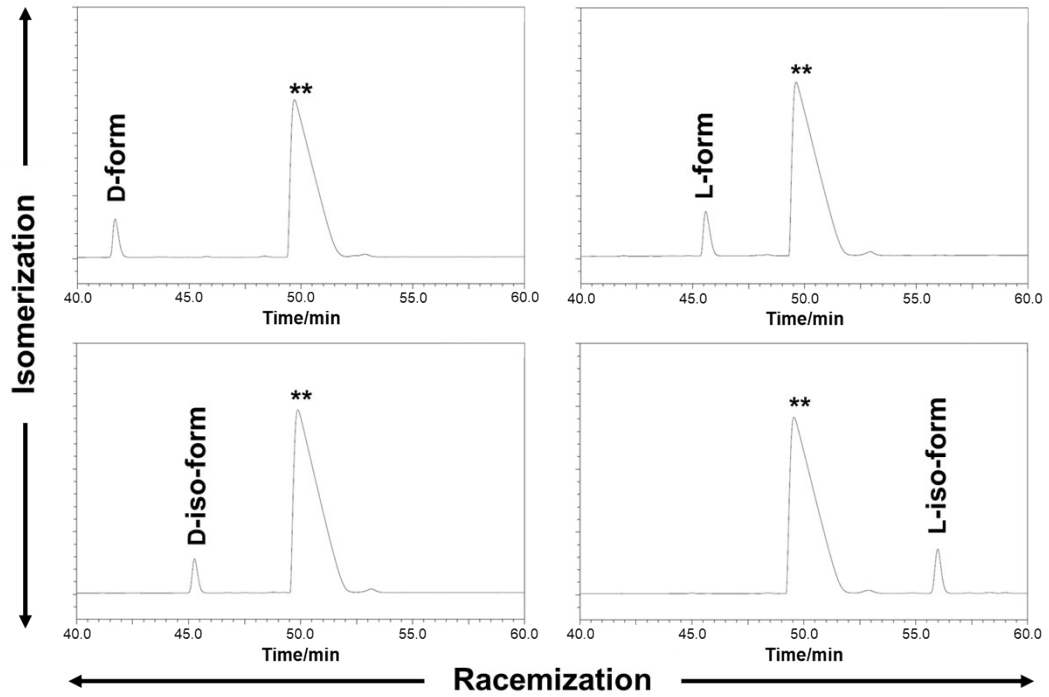

Supplement: d2an01885c1.pdf [file d2an01885c1.pdf]
